# Supplementary material for: Formamidinium iodide for instantaneous and fluorescent detection of Pb2+ in water
Source: Royal Society of Chemistry journal article supplement (doi:10.1039/d3tc00235g), 2023-01-01
Supplement: d3tc00235g1.pdf [file d3tc00235g1.pdf]

## Supporting Information

### Formamidinium Iodide for Instantaneous and Fluorescent Detection of $\text{Pb}^{2+}$ in Water

Md Ashiqur Rahman Laskar<sup>†, a</sup>, Md Tawabur Rahman<sup>†, a, b</sup>, Khan Mamun Reza<sup>a</sup>, Abdullah Al Maruf<sup>c</sup>, Nabin Ghimire<sup>a</sup>, Brian Logue<sup>d</sup>, Qiquan Qiao<sup>a, e\*</sup>

<sup>a</sup>Department of Electrical Engineering and Computer Science, South Dakota State University, Brookings, SD 57007, USA

<sup>b</sup>Department of Electrical and Electronic Engineering, Khulna University of Engineering & Technology, Khulna 9203, Bangladesh

<sup>c</sup>Department of Physics, South Dakota State University, Brookings, SD 57007, USA

<sup>d</sup>Department of Chemistry and Biochemistry, South Dakota State University, Brookings, SD 57007, USA  
<sup>e</sup>Department of Mechanical and Aerospace Engineering, Syracuse University, Syracuse, NY 13244, USA

<sup>†</sup>These authors contributed equally

\***Email:** quqiao@syr.edu, tawabur@eee.kuet.ac.bd

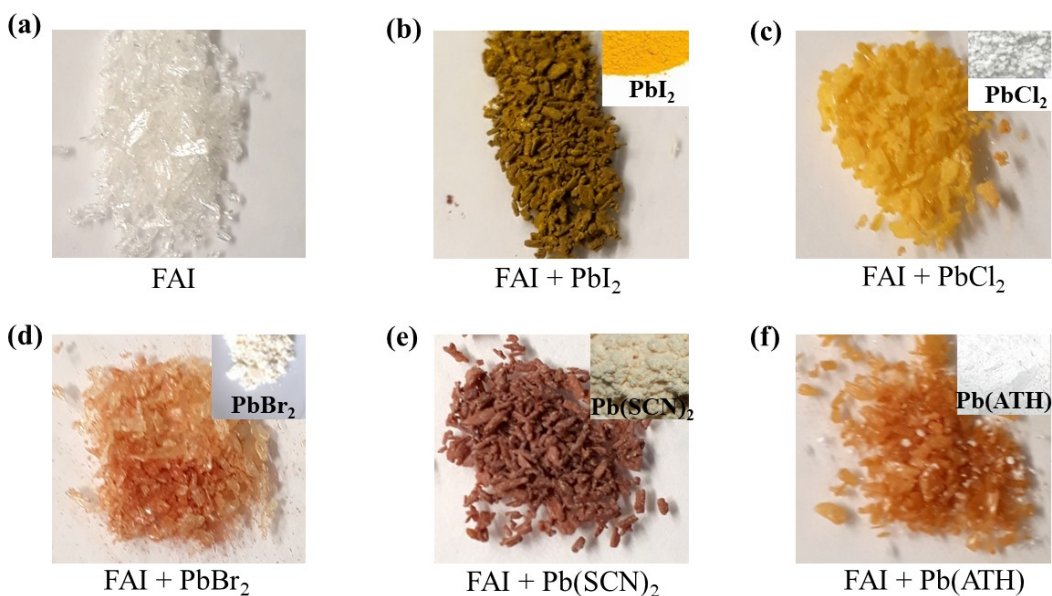

**Figure S1.** a) FAI powder. b-f) Photographs of FAI after mixing (5:1) with different  $\text{Pb}^{2+}$  species like  $\text{PbI}_2$ ,  $\text{PbCl}_2$ ,  $\text{PbBr}_2$ ,  $\text{Pb}(\text{SCN})_2$ ,  $\text{Pb}(\text{CH}_3\text{COO})_2 \cdot 3\text{H}_2\text{O}$ . Here  $\text{Pb}(\text{ATH})$  stands for Lead (II) Acetate Trihydrate or  $\text{Pb}(\text{CH}_3\text{COO})_2 \cdot 3\text{H}_2\text{O}$ .

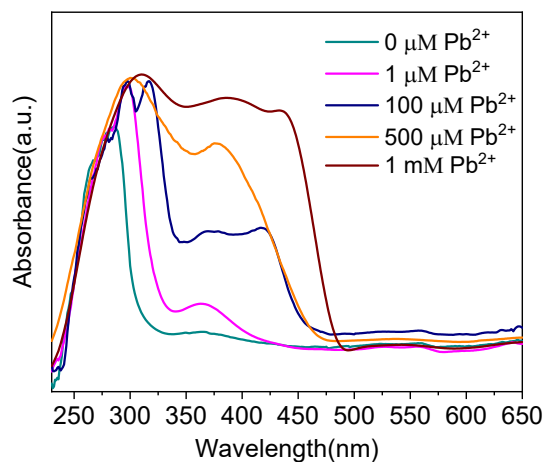

**Figure S2.** UV-Vis absorbance spectra of sensing solutions with different concentrations of  $\text{Pb}^{2+}$ .

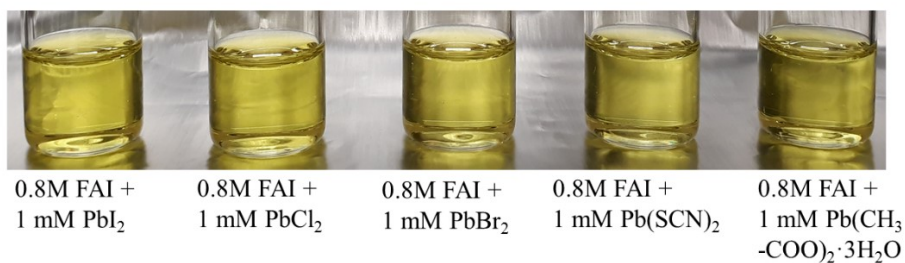

**Figure S3.** Images of sensing solutions with 1 mM  $\text{Pb}^{2+}$  from different source compounds.

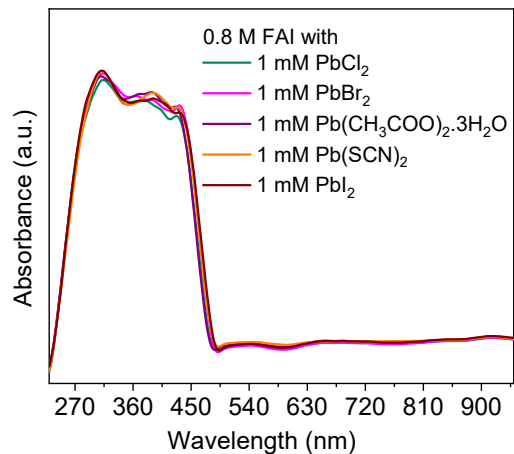

**Figure S4.** UV-Vis absorbance spectra of sensing solutions with 1 mM  $\text{Pb}^{2+}$  from different source compounds.

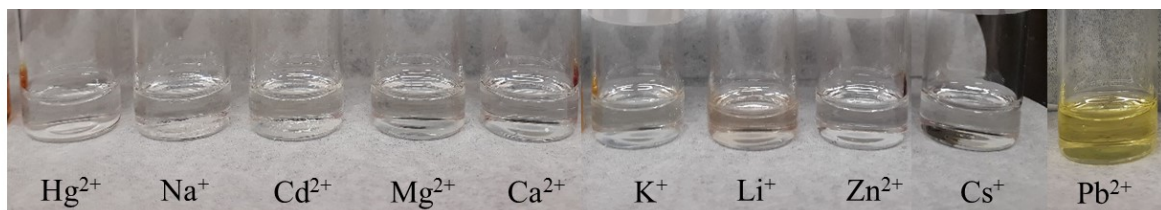

**Figure S5.** Images of sensing solutions with different metal ions at 500  $\mu\text{M}$ .

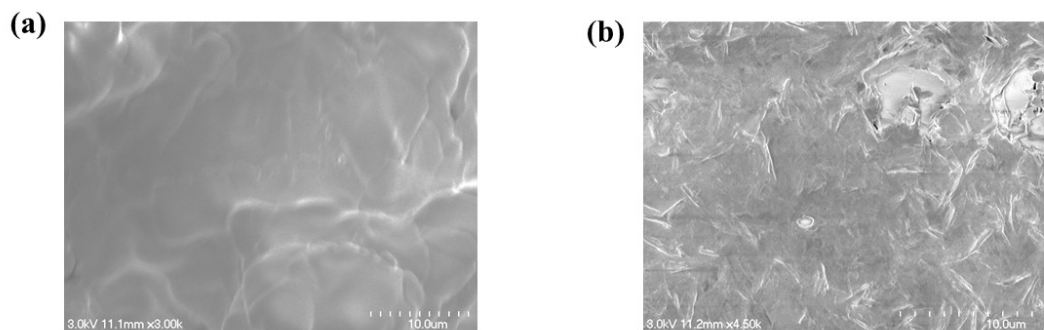

**Figure S6.** SEM images of a) FAI b)  $\text{PbI}_2$ .

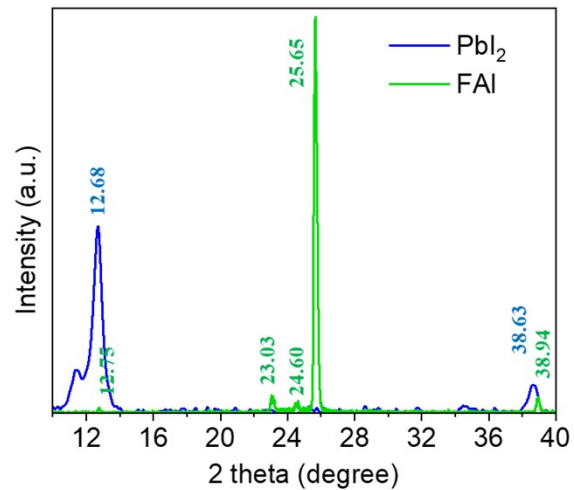

**Figure S7.** XRD of FAI and  $\text{PbI}_2$ .

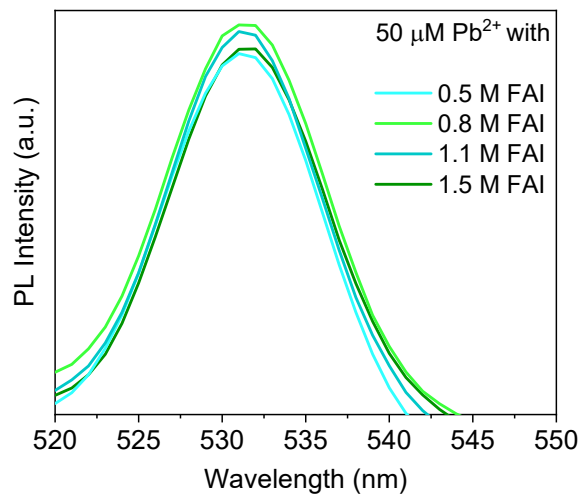

**Figure S8.** PL spectra of  $\text{FAPbI}_3$  solutions at different FAI concentrations.

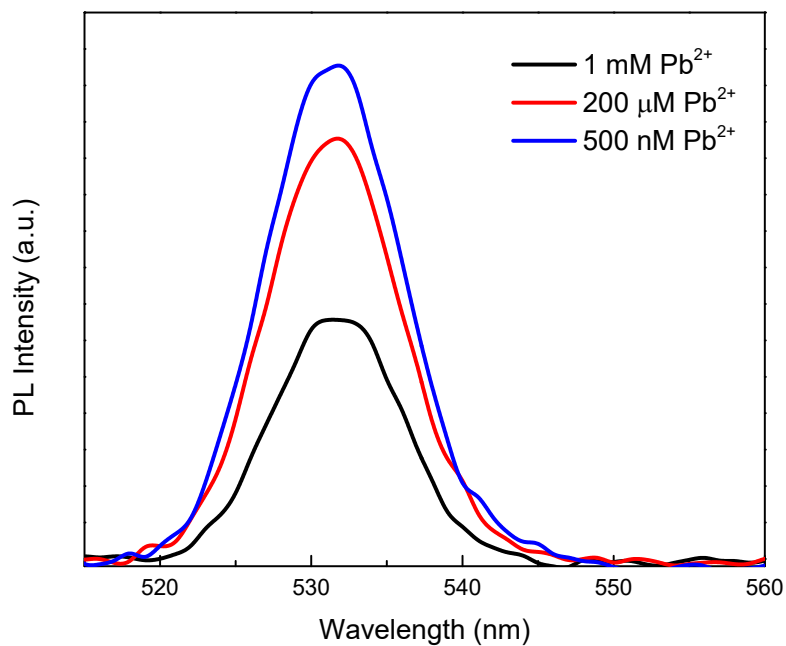

**Figure S9.** PL spectra of FAPbI<sub>3</sub> solutions with tap water samples

Table S1: Electrostatic potential (ESP) of FA<sup>+</sup> under vacuum, DMF, and water

| Material        | Atom               | Vacuum (kJ/mol) | DMF (kJ/mol) | Water (kJ/mol) |
|-----------------|--------------------|-----------------|--------------|----------------|
| FA <sup>+</sup> | N-C-N <sup>a</sup> | 735.258         | 740.369      | 740.814        |

<sup>a</sup>Electrons are delocalized on the resonance structure of N-C-N

Table S2. Comparison of sensing performance among different Pb<sup>2+</sup> sensors.

| Modifications                                                        | LOD (nM)  | LDR (nM)      | Methods                       | References |
|----------------------------------------------------------------------|-----------|---------------|-------------------------------|------------|
| FAPbI <sub>3</sub> perovskite                                        | 100 nM    | 100 nM - 1 mM | Colorimetric and Fluorometric | This work  |
| CH <sub>3</sub> NH <sub>3</sub> PbBr <sub>3</sub> perovskite         | 1.6 mM    | 1.6 - 200 mM  | Fluorometric                  | [1]        |
| AlGa <sub>x</sub> N <sub>1-x</sub> /Ga <sub>x</sub> N <sub>1-x</sub> | 0.0576 nM | 0.5 - 20 nM   | HEMT                          | [2]        |
| 1T and 2H MoS <sub>2</sub>                                           | 0.031 nM  | -             | Electrochemical               | [3]        |

|                                                     |          |                  |                 |     |
|-----------------------------------------------------|----------|------------------|-----------------|-----|
| Metal-organic framework (MOF)                       | 7.7 pM   | -                | Fluorometric    | [4] |
| Delonix regia leaf-derived CQDs                     | 3.3 nM   | 10 - 180 $\mu$ M | Electrochemical | [5] |
| Ga <sub>2</sub> O <sub>3</sub> NPs                  | 84 nM    | 0.3 - 80 $\mu$ M | Electrochemical | [6] |
| TiO <sub>2</sub> @Gum Arabic-Carbon Paste Electrode | 101.2 nM | 5 - 50 nM        | Electrochemical | [7] |

HEMT: High electron mobility transistor; MoS<sub>2</sub>: Molybdenum disulfide; NPs: Nanoparticles; CQDs: Carbon quantum dots.

#### References

- [1] J. Yan, Y. He, Y. Chen, Y. Zhang, and H. Yan, "CH<sub>3</sub>NH<sub>3</sub>Br solution as a novel platform for the selective fluorescence detection of Pb<sup>2+</sup> ions," *Sci Rep*, vol. 9, no. 1, p. 15840, 2019.
- [2] A. Nigam *et al.*, "Real time detection of Hg<sup>2+</sup> ions using MoS<sub>2</sub> functionalized AlGa<sub>N</sub>/Ga<sub>N</sub> high electron mobility transistor for water quality monitoring," *Sens Actuators B Chem*, vol. 309, p. 127832, 2020.
- [3] N. Sharma, A. Nigam, S. Bin Dolmanan, A. Gupta, S. Tripathy, and M. Kumar, "1T and 2H heterophase MoS<sub>2</sub> for enhanced sensitivity of Ga<sub>N</sub> transistor-based mercury ions sensor," *Nanotechnology*, vol. 33, no. 26, p. 265501, 2022.
- [4] S. Venkateswarlu, A. S. Reddy, A. Panda, D. Sarkar, Y. Son, and M. Yoon, "Reversible fluorescence switching of metal-organic framework nanoparticles for use as security ink and detection of Pb<sup>2+</sup> ions in aqueous media," *ACS Appl Nano Mater*, vol. 3, no. 4, pp. 3684-3692, 2020.
- [5] A. M. Babu, G. Bijoy, P. Keerthana, and A. Varghese, "Fluorescent detection of Pb<sup>2+</sup> pollutant in water samples with the help of Delonix regia leaf-derived CQDs," *Synth Met*, vol. 291, p. 117211, 2022.
- [6] G. A. El-Fatah, H. S. Magar, R. Y. A. Hassan, R. Mahmoud, A. A. Farghali, and M. E. M. Hassouna, "A novel gallium oxide nanoparticles-based sensor for the simultaneous electrochemical detection of Pb<sup>2+</sup>, Cd<sup>2+</sup> and Hg<sup>2+</sup> ions in real water samples," *Sci Rep*, vol. 12, no. 1, p. 20181, 2022.
- [7] S. K. Sivan *et al.*, "Fabrication of a Greener TiO<sub>2</sub>@ Gum arabic-carbon paste electrode for the electrochemical detection of pb<sup>2+</sup> ions in plastic toys," *ACS Omega*, vol. 5, no. 39, pp. 25390-25399, 2020.
